# Supplementary material
Source: Elsevier journal article supplement (https://www.sciencedirect.com/science/article/pii/S1130862119303353)
Supplement: mmc1 [file S1130862119303353:mmc1.pdf]

| PROCESSO DE ENFERMAGEM: DIAGNÓSTICO E EVOLUÇÃO DE ENFERMAGEM                                                                                              |                                                                                                                                                                        |                                                                                                                                      |         | Unidade/Leito: _____   |         |         |         |  |
|-----------------------------------------------------------------------------------------------------------------------------------------------------------|------------------------------------------------------------------------------------------------------------------------------------------------------------------------|--------------------------------------------------------------------------------------------------------------------------------------|---------|------------------------|---------|---------|---------|--|
|                                                                                                                                                           |                                                                                                                                                                        |                                                                                                                                      |         | Idade: _____           |         |         |         |  |
| Diagnóstico de Enfermagem                                                                                                                                 |                                                                                                                                                                        | Resultados                                                                                                                           |         | Evolução de Enfermagem |         |         |         |  |
| Fator relacionado                                                                                                                                         | Evidência                                                                                                                                                              |                                                                                                                                      | ___/___ | ___/___                | ___/___ | ___/___ | ___/___ |  |
| ( ) Defesas primárias inadequadas<br>( ) Defesas secundárias inadequadas<br>( ) Procedimentos invasivos                                                   |                                                                                                                                                                        | Não apresentará infecção                                                                                                             |         |                        |         |         |         |  |
| ( ) Dor<br>( ) Fraqueza<br>( ) Prejuízo perceptivo<br>( ) Prejuízo neuromuscular<br>( ) Prejuízo musculoesquelético                                       | ( ) Incapacidade de acessar o banheiro<br>( ) Incapacidade de lavar o corpo<br>( ) Incapacidade de secar o corpo                                                       | Realizará atividade de auto-cuidado no nível ideal esperado ou comunicará satisfação com o que consegue fazer, apesar das limitações |         |                        |         |         |         |  |
| ( ) Fadiga da musculatura respiratória<br>( ) Fatores metabólicos                                                                                         | ( ) Agitação ( ) Dispneia ( ) PCO <sub>2</sub> aumentada<br>( ) PO <sub>2</sub> diminuída ( ) SaO <sub>2</sub> diminuída<br>( ) Uso aumentado de musculatura acessória | Apresentará melhora na troca gasosa                                                                                                  |         |                        |         |         |         |  |
| ( ) Presença de via aérea artificial<br>( ) Secreções retidas                                                                                             | ( ) Dispneia ( ) Tosse ineficaz<br>( ) Tosse ausente ( ) RA respiratórios                                                                                              | Apresentará vias áreas livres                                                                                                        |         |                        |         |         |         |  |
| ( ) Nível de consciência reduzido<br>( ) Alimentação por sonda ( ) Presença de:<br>( ) sonda endotraqueal, ( ) traqueostomia                              |                                                                                                                                                                        | Não aspirará secreções GI, orofaríngeas, sólidos ou fluidos nas vias aéreas                                                          |         |                        |         |         |         |  |
| ( ) Extremos de idade ( ) Fatores mecânicos<br>( ) Imobilização física ( ) Umidade<br>( ) Estado nutricional desequilibrado<br>( ) Sensações prejudicadas |                                                                                                                                                                        | A pele não será alterada de forma adversa                                                                                            |         |                        |         |         |         |  |
| ( ) Extremos de idade ( ) Umidade<br>( ) Fatores mecânicos<br>( ) Imobilização física                                                                     | ( ) Destruição de camadas da pele<br>( ) Invasão de estruturas do corpo<br>( ) Rompimento da superfície da pele                                                        | Apresentará sinais de cicatrização progressiva da pele                                                                               |         |                        |         |         |         |  |
| ( ) Restrições prescritas de movimento<br>( ) Dor ( ) Enrijecimento das articulações<br>( ) Força muscular diminuída                                      | ( ) Restrições de movimentos<br>( ) Instabilidade postural                                                                                                             | Apresentará aumento de força e resistência                                                                                           |         |                        |         |         |         |  |
| ( ) Capacidade prejudicada de: ( ) ingerir,<br>( ) digerir, ( ) absorver alimentos<br>( ) Fatores psicológicos                                            | ( ) Falta de interesse na comida<br>( ) Fraqueza dos músculos necessários<br>( ) Relato de ingestão inadequada                                                         | Manterá IMC - índice de massa corporal                                                                                               |         |                        |         |         |         |  |
| ( ) Agentes lesivos (biológicos, químicos, físicos, psicológicos)                                                                                         | ( ) Expressão facial ( ) Relato verbal de dor<br>( ) Mudanças na FC ( ) Mudanças na FR                                                                                 | Relatará alívio da dor após medida satisfatória                                                                                      |         |                        |         |         |         |  |

| PROCESSO DE ENFERMAGEM – PRESCRIÇÃO DE ENFERMAGEM                                                                                                                                                                               |                        |                        |                        |
|---------------------------------------------------------------------------------------------------------------------------------------------------------------------------------------------------------------------------------|------------------------|------------------------|------------------------|
| Idade: _____                                                                                                                                                                                                                    |                        |                        |                        |
| Leito: _____                                                                                                                                                                                                                    |                        |                        |                        |
| Setor: _____                                                                                                                                                                                                                    |                        |                        |                        |
|                                                                                                                                                                                                                                 | Data<br>____/____/____ | Data<br>____/____/____ | Data<br>____/____/____ |
| <input type="checkbox"/> Orientar o paciente antes de iniciar os procedimentos                                                                                                                                                  |                        |                        |                        |
| <input type="checkbox"/> Manter cuidados de precaução: <input type="checkbox"/> contato <input type="checkbox"/> aérea-gotícula <input type="checkbox"/> aérea-aerossol                                                         |                        |                        |                        |
| <input type="checkbox"/> Realizar banho <input type="checkbox"/> leito <input type="checkbox"/> chuveiro <input type="checkbox"/> cadeira higiênica <input type="checkbox"/> Renovar eletrodos após banho                       |                        |                        |                        |
| <input type="checkbox"/> Realizar higiene oral com _____ n° vezes ao dia                                                                                                                                                        |                        |                        |                        |
| <input type="checkbox"/> Realizar higiene íntima com _____ n° vezes ao dia                                                                                                                                                      |                        |                        |                        |
| <input type="checkbox"/> Realizar higienização peri - traqueostomia _____ n° vezes ao dia                                                                                                                                       |                        |                        |                        |
| <input type="checkbox"/> Aspirar e anotar a característica da secreção de <input type="checkbox"/> traqueostomia <input type="checkbox"/> TOT                                                                                   |                        |                        |                        |
| <input type="checkbox"/> Trocar fixação <input type="checkbox"/> traqueostomia <input type="checkbox"/> TOT <input type="checkbox"/> SNG <input type="checkbox"/> SNE <input type="checkbox"/> SOG <input type="checkbox"/> SVD |                        |                        |                        |
| <input type="checkbox"/> Realizar troca de fixação de acesso vascular em _____                                                                                                                                                  |                        |                        |                        |
| <input type="checkbox"/> Registrar condições do local de inserção do acesso vascular                                                                                                                                            |                        |                        |                        |
| <input type="checkbox"/> Realizar curativo de _____ com _____ n° vezes ao dia                                                                                                                                                   |                        |                        |                        |
| <input type="checkbox"/> Registrar condições do local de inserção do acesso vascular                                                                                                                                            |                        |                        |                        |
| <input type="checkbox"/> Realizar troca em 72 hs de <input type="checkbox"/> punção venosa periférica <input type="checkbox"/> equipos <input type="checkbox"/> torneirinhas <input type="checkbox"/> extensão látex            |                        |                        |                        |
| <input type="checkbox"/> Colocar/trocar/manter colchão caixa de ovo <input type="checkbox"/> Proteger proeminências ósseas                                                                                                      |                        |                        |                        |
| <input type="checkbox"/> Realizar hidratação da pele com _____ n° vezes ao dia                                                                                                                                                  |                        |                        |                        |
| <input type="checkbox"/> Realizar mudança de decúbito de ____ / ____ horas                                                                                                                                                      |                        |                        |                        |
| <input type="checkbox"/> Rodiziar sensor de oxímetro e pressão não invasiva de ____ / ____ horas                                                                                                                                |                        |                        |                        |
| <input type="checkbox"/> Verificar e anotar débito do dreno e suas características                                                                                                                                              |                        |                        |                        |
| <input type="checkbox"/> Troca selo d'água de dreno se volume > 2/3 do volume total                                                                                                                                             |                        |                        |                        |
| <input type="checkbox"/> Manter cabeça elevada com decúbito de _____ graus                                                                                                                                                      |                        |                        |                        |
| <input type="checkbox"/> Confirmar a localização de SNE/SNG/SOG antes de administrar medicações ou dietas                                                                                                                       |                        |                        |                        |
| <input type="checkbox"/> Observar e registrar distensão abdominal _____ <input type="checkbox"/> Anotar volume de resíduo gástrico                                                                                              |                        |                        |                        |
| <input type="checkbox"/> Administrar ____ ml de água filtrada na SNE/SNG/SOG após medicações e dietas                                                                                                                           |                        |                        |                        |
| <input type="checkbox"/> Observar e anotar sinais de hipo/hiperglicemia                                                                                                                                                         |                        |                        |                        |
| <input type="checkbox"/> Rodiziar locais de aplicação de <input type="checkbox"/> insulina SC <input type="checkbox"/> glicemia capilar                                                                                         |                        |                        |                        |
| <input type="checkbox"/> Observar e registrar: <input type="checkbox"/> aceitação dieta <input type="checkbox"/> eliminações <input type="checkbox"/> sangramento <input type="checkbox"/> algias                               |                        |                        |                        |
| <input type="checkbox"/> Incentivar a ingesta alimentar e hídrica VO                                                                                                                                                            |                        |                        |                        |
| <input type="checkbox"/> Manter repouso no leito/manipulação mínima <input type="checkbox"/> Auxiliar/estimular deambulação                                                                                                     |                        |                        |                        |
| <input type="checkbox"/> Manter: <input type="checkbox"/> cama com grade elevada <input type="checkbox"/> campanha próxima ao paciente                                                                                          |                        |                        |                        |
| <input type="checkbox"/> Manter contenção S/N e avaliar condição(s) do(s) membro(s) contido(s)                                                                                                                                  |                        |                        |                        |
| <input type="checkbox"/> Registrar demais queixas (perturbação do sono, luz, som, etc)                                                                                                                                          |                        |                        |                        |
